# Supplementary material
Source: Frontiers journal article supplement (https://www.frontiersin.org/articles/515561)
Supplement: Image_1.PDF [file Image_1.PDF]

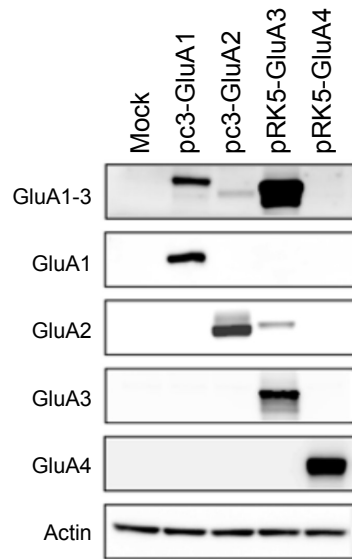

**Figure S1.** Specificity of anti-GluA1-3 antibody validated by Western blot analysis

COS-7 cells were transfected with expression vector for AMPA receptor subunits and analyzed by immunoblotting with anti-GluA1-3, anti-GluA1, anti-GluA2, anti-GluA3, anti-GluA4, or anti-actin antibody. The anti-GluA1-3 antibody reacted with GluA1, GluA2 and GluA3, but not with GluA4.

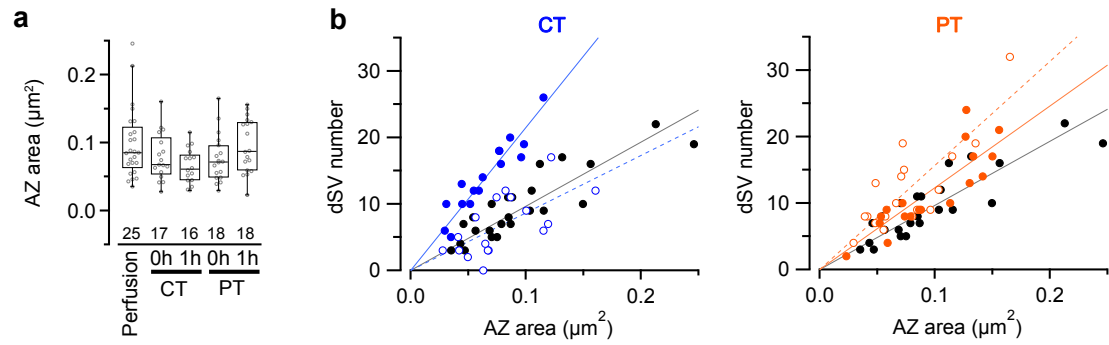

**Figure S2.** Correlation between AZ area and docked SV numbers

**a,** Summary of the AZ area in PF boutons. Numerals in plot indicate the numbers of analyzed boutons for each group.

**b,** Correlation between AZ area and dSV number in cold-cut (left) or warm-cut (right) slices. Black circles indicate the values in perfusion-fixed tissues. Open and closed circles indicate before and after 1-h recovery time, respectively. Lines show the regression lines of each group (blue: CT, red: PT, dotted: 0 h, solid: 1 h).
